# Supplementary material
Source: publisher site journal article supplement (https://www.dovepress.com/article/415618)
Supplement: Supplementary file 1 [file get_supplementary_file.php]

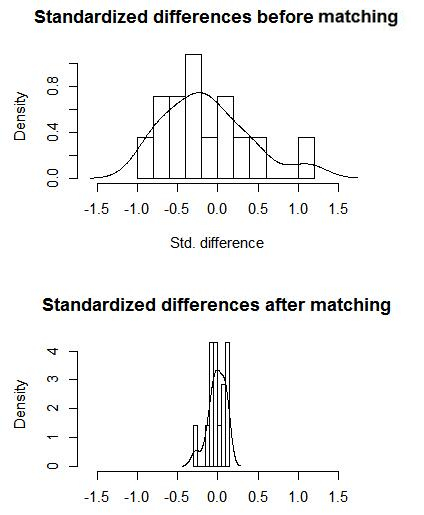


Figure S1 Standard deviation distribution histogram before and after propensity score matched
